# Supplementary material for: Optimizing EphA2-CAR T Cells for the Adoptive Immunotherapy of Glioma
Source: PubMed Central journal article supplement — Mol Ther Methods Clin Dev. 2018 Feb 2;9:70–80. doi: 10.1016/j.omtm.2018.01.009 (PMC5852415; doi:10.1016/j.omtm.2018.01.009), 2018-02-02
Supplement: mmc1.pdf [file mmc1.pdf]

**OMTM, Volume 9**

## **Supplemental Information**

### **Optimizing EphA2-CAR T Cells for the Adoptive Immunotherapy of Glioma**

**Zhongzhen Yi, Brooke L. Prinzing, Felicia Cao, Stephen Gottschalk, and Giedre Krenciute**

## Supplementary Figure 1

**A**

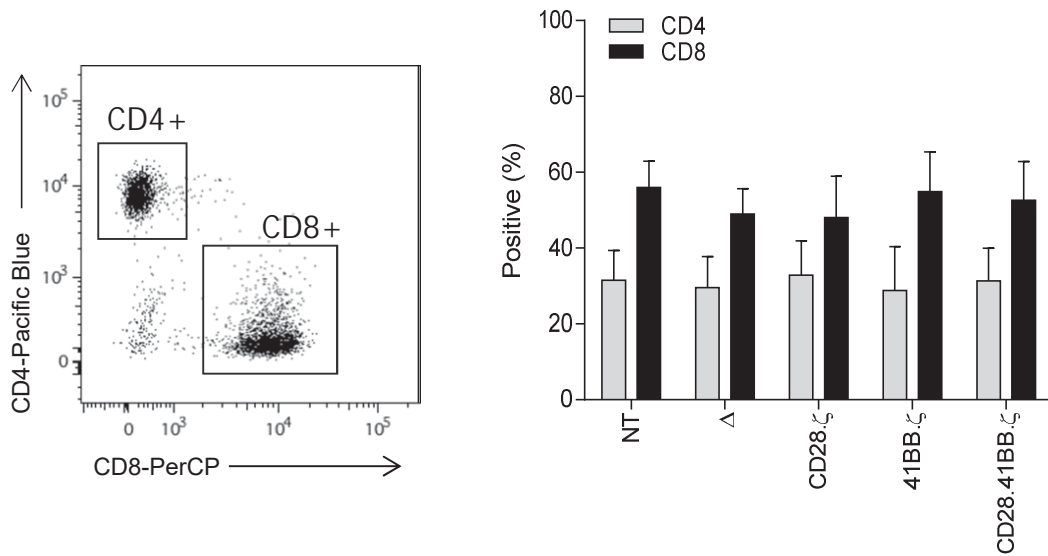

**B**

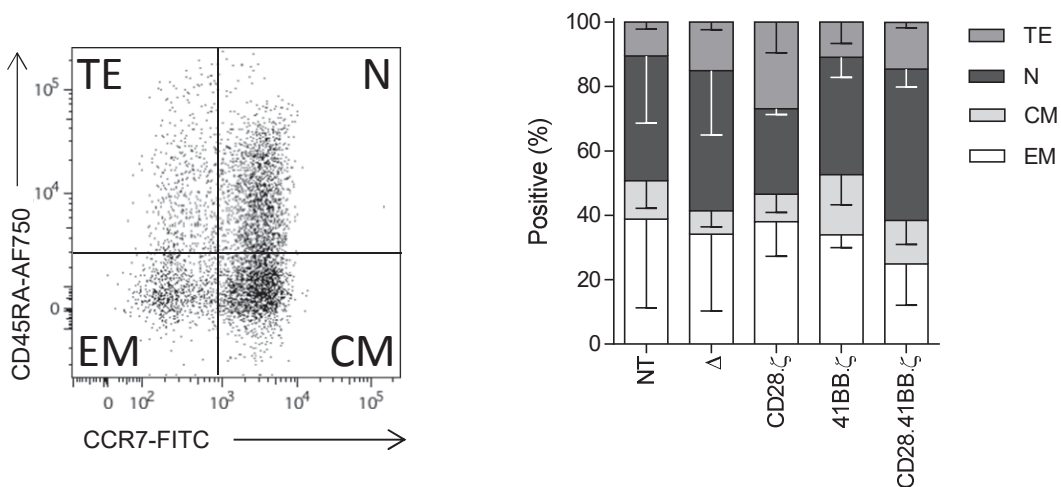

**Supplementary Figure 1: Phenotypic analysis of EphA2-CAR T-cell lines.** (A) CAR T cells were analyzed for CD4 and CD8 surface expression by using CD4-PacBlue and CD8-PerCP antibodies (BD Biosciences; n=4). (B) CAR T cells were analyzed for CD45RA and CCR7 surface expression by using CD45RA-AF750 and CCR7-FITC antibodies (BD Biosciences; n=3). TE – terminal effector, N – Naïve, EM – effector memory, CM – central memory.

## Supplementary Figure 2

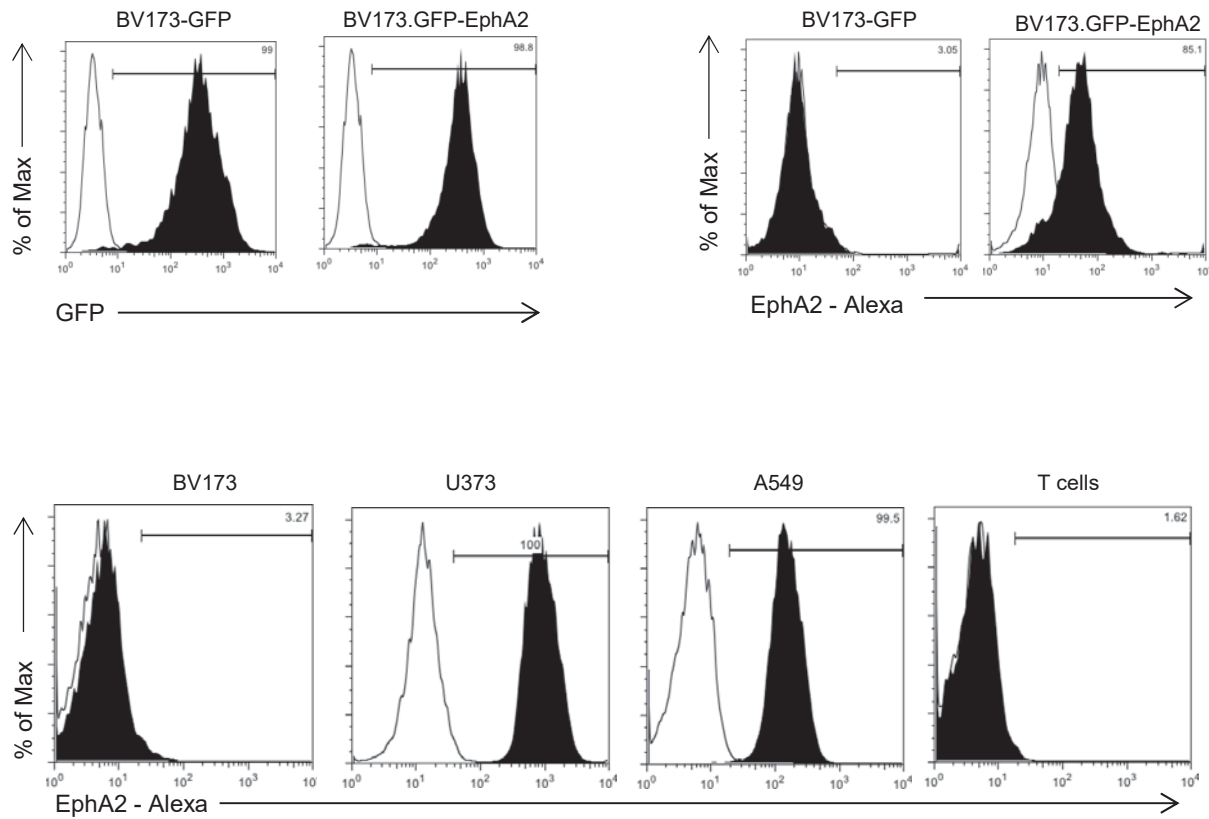

**Supplementary Figure 2: Cell surface expression of EphA2.** Cell lines were analyzed for EphA2 cell surface expression by using primary mouse anti-EphA2 antibody (MAB3035, R&D) followed by secondary goat anti-mouse IgG Alexa647 (Life Technologies).

## Supplementary Figure 3

**A**

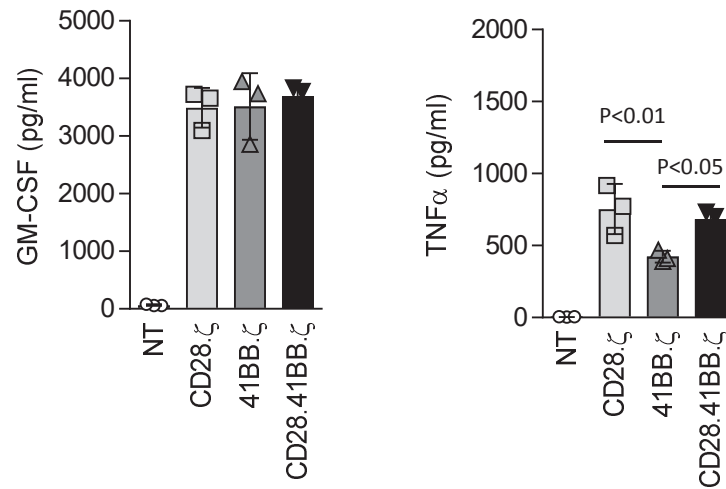

**B**

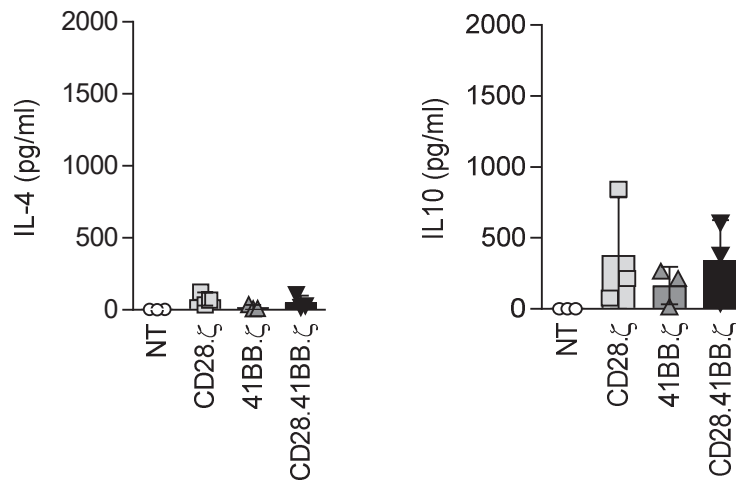

**Supplementary Figure 3: Cytokine secretion analysis when EphA2-specific CAR T cells were co-cultured with BV173.EphA2 tumor cells.** EphA2-specific CAR T cells were co-cultured with BV173.EphA2 cells at a 2:1 E:T ratio and 24 hours later a small aliquot of media was removed to determine the concentrations of cytokines by Multiplex assay (HSTCMAG28SPMX13, EMD Millipore, Billerica, MA). NT served as controls. (n=4; for TNFα: CD28.ζ vs 41BB.ζ,  $p<0.01$ , 41BB.ζ vs CD28.41BB.ζ,  $p<0.05$ ).

## Supplementary Figure 4

**A**

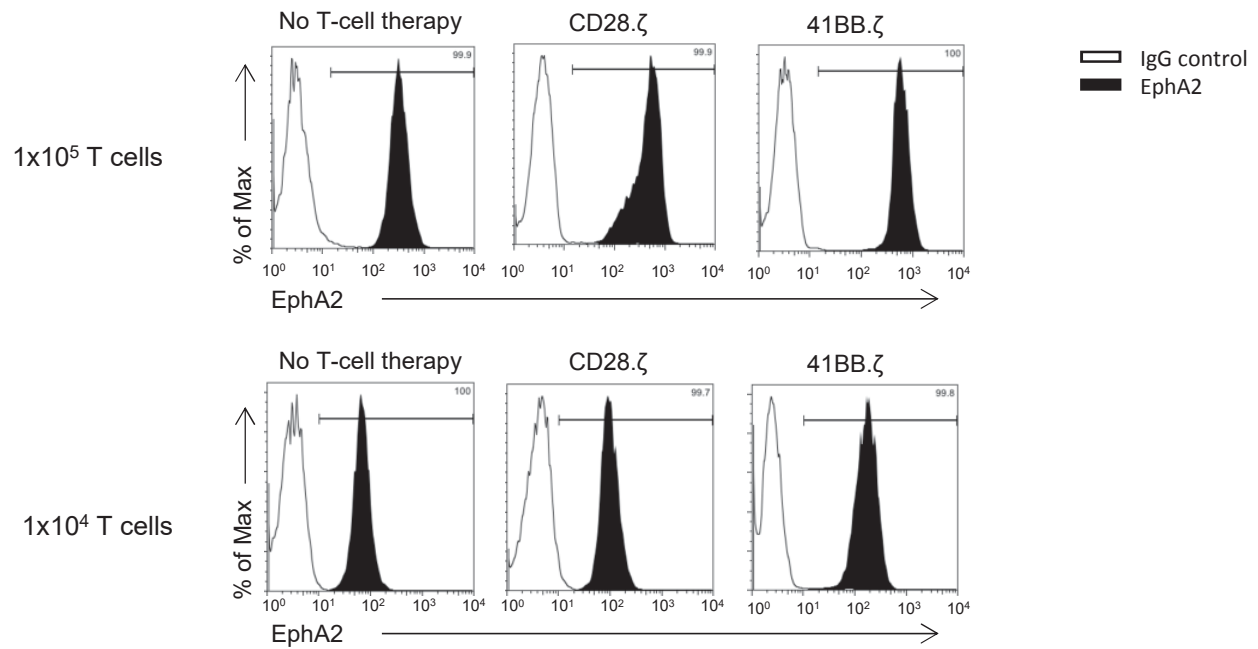

**B**

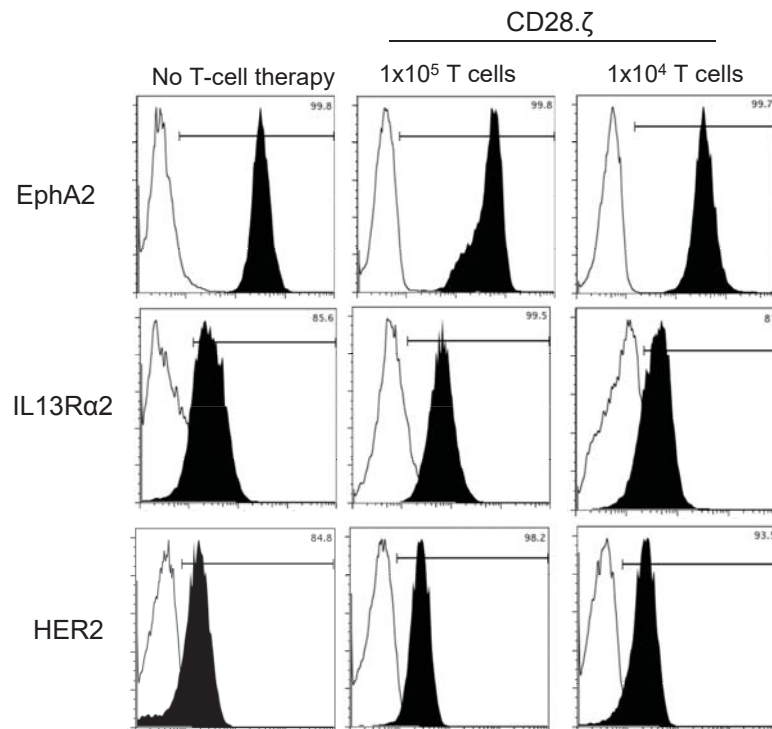

**Supplementary Figure 4: Analysis of U373 cells isolated from recurrent tumors.** U373 cells were isolated from recurrent tumor of mice that were treated with EphA2-CAR T cells. After short-term culture (2 to 7 days), FACS analysis was performed. **(A)** FACS analysis for EphA2. Representative plots, n=2-3 in each group.

## Supplementary Figure 5

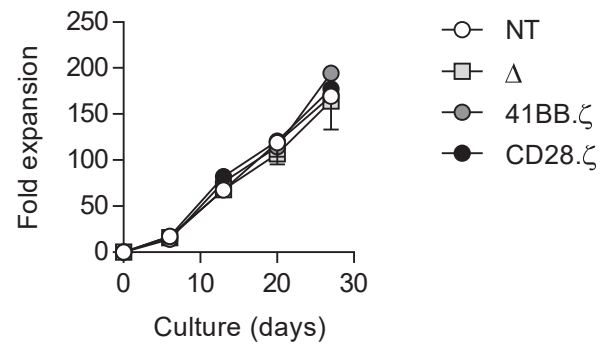

**Supplementary Figure 5. CD28. $\zeta$  and 41BB. $\zeta$  CAR T cell expansion.** CAR T cells were plated at  $0.25 \times 10^6$  cell per well of 24-well plate and subsequently expanded in a regular T cell culture media with IL-7 and IL15. CAR T cells were counted every 7 days. Figure shows cumulative data of CAR T cell expansion.

## Supplementary Figure 6

**A**

CD28.ζ.CD20

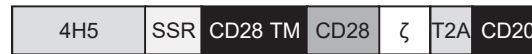

**B**

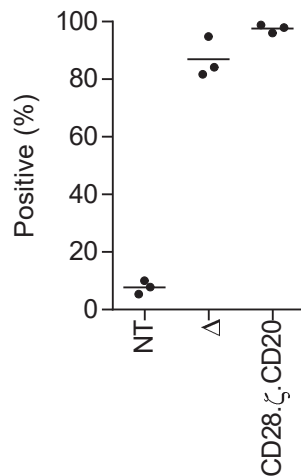

**C**

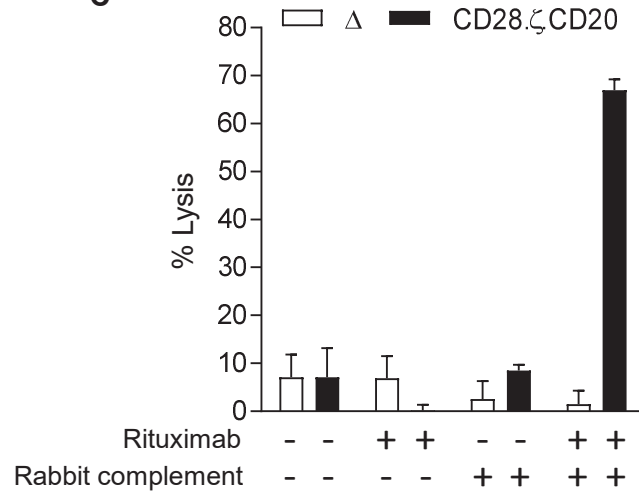

**D**

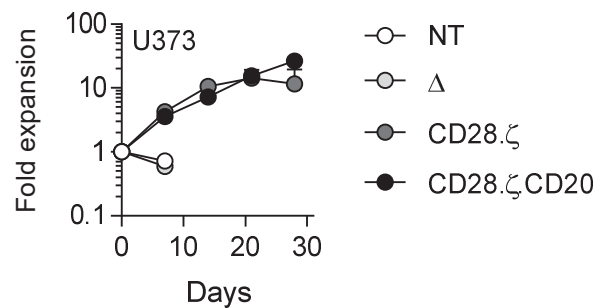

**Supplementary Figure 6: Schematic representation of EphA2-specific CD28.ζ CAR containing CD20.** (A) Scheme of the CD28.ζ.CD20 CAR. tCD19 in CD28.ζ CAR was replaced with CD20 and will serve as a safety switch and CAR detection molecule. (B) Expression of the CAR was determined by the FACS analysis; summary data. (C) CD20 functionality test using <sup>51</sup>Cr release assay. CD28.ζ.CD20 and Δ CAR T cells were labeled with <sup>51</sup>Chromium and treated with rituximab and/or complement in a standard cytotoxicity assay. (n=3; assay was performed in triplicate); (D) EphA2-specific CD28.ζ and CD28.ζ.CD20 CAR T cells were co-cultured with U373 at a 2:1 E:T ratio. T cells were stimulated weekly with fresh U373 cells, and T cells were counted before addition of fresh target cells. Figure shows cumulative data of CAR T cell expansion (n=2-3; error bars represent SEM); NT and Δ served as controls.
